# Supplementary material for: Dissection of the molecular bases of genotype x environment interactions: a study of phenotypic plasticity of Saccharomyces cerevisiae in grape juices
Source: PubMed Central journal article supplement (PMC6225642; doi:10.1186/s12864-018-5145-4), 2018-11-09

Cluster 1 n= 56 and 39

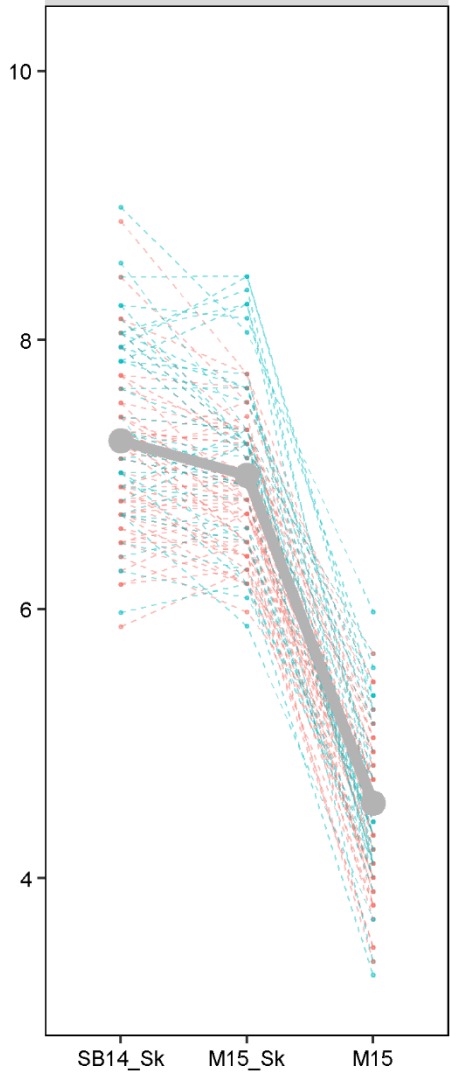

Cluster 2 n= 17 and 34 \*

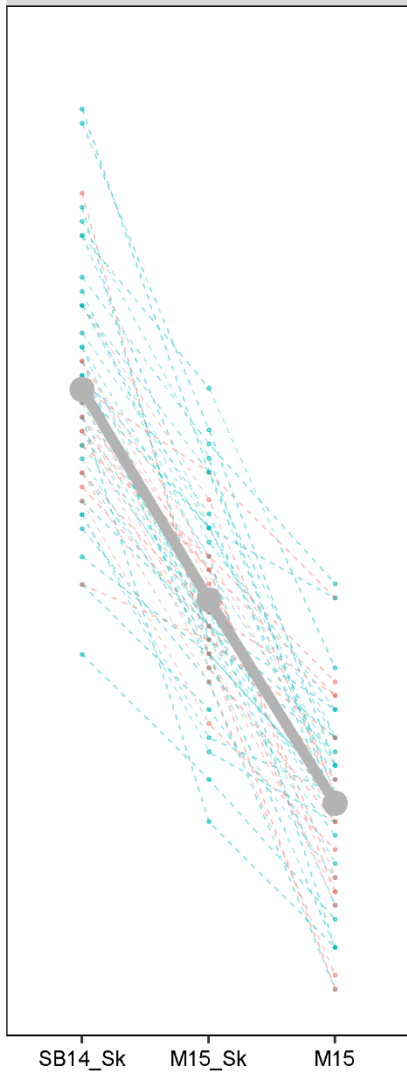

Cluster 3 n= 22 and 21

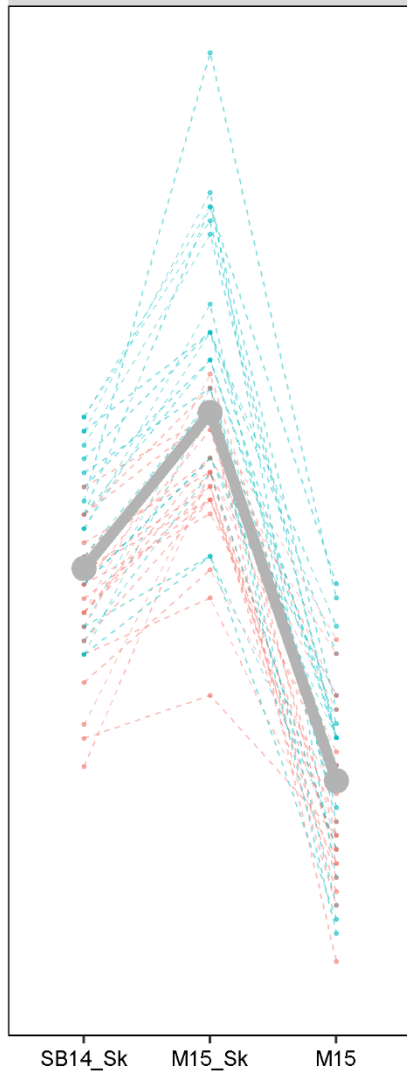

Cluster 1 n= 71 and 63

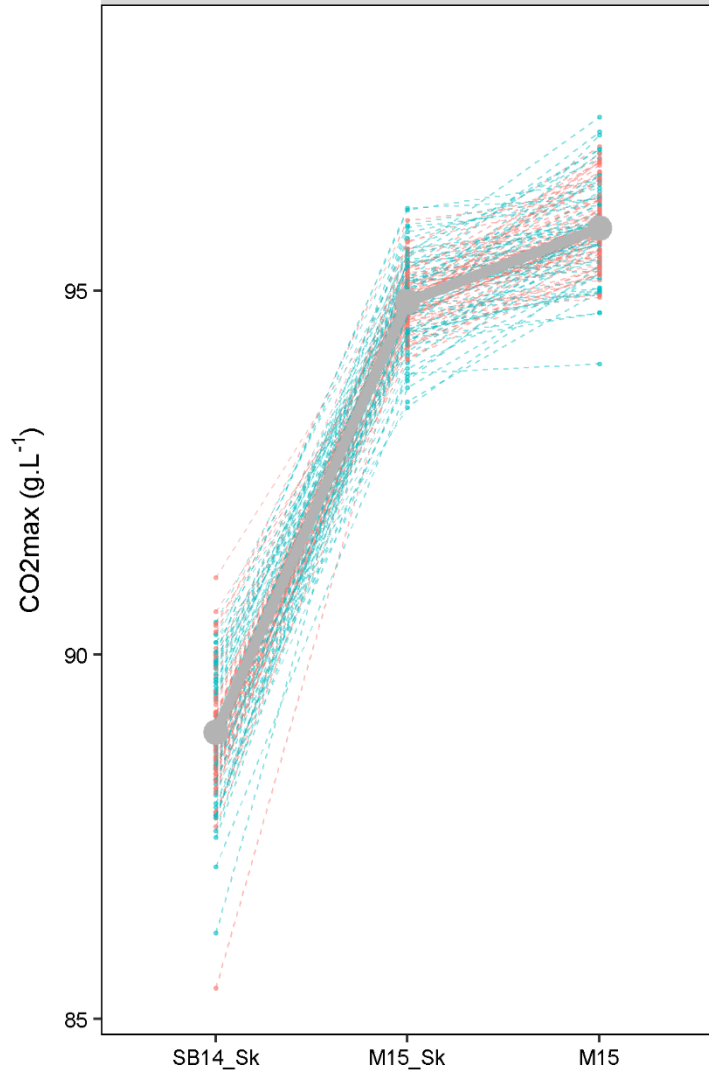

Cluster 2 n= 23 and 31

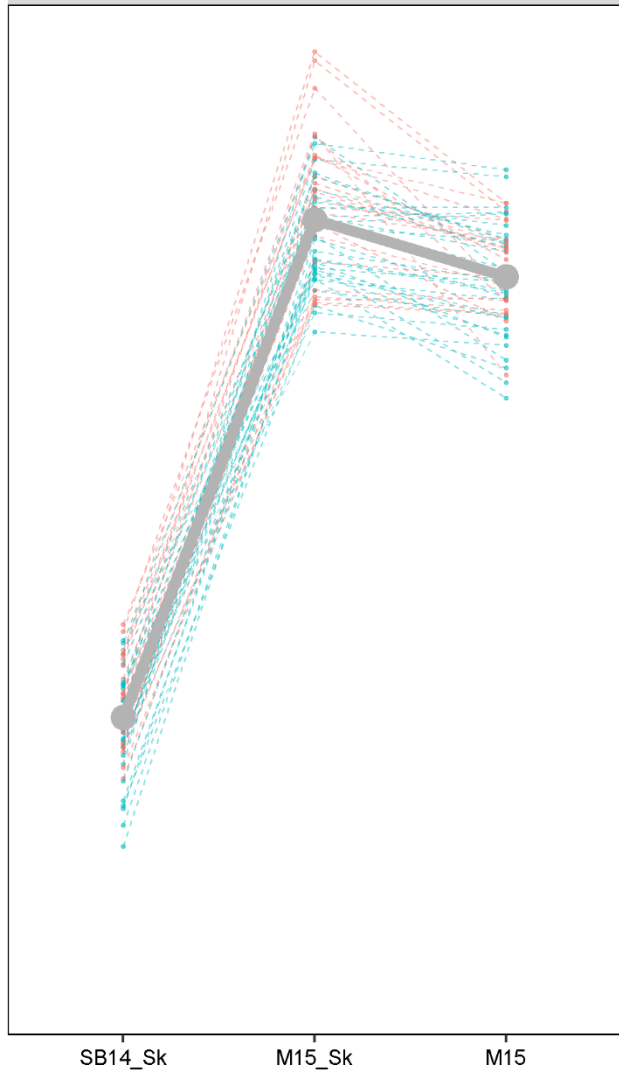

Cluster 1 n= 52 and 49

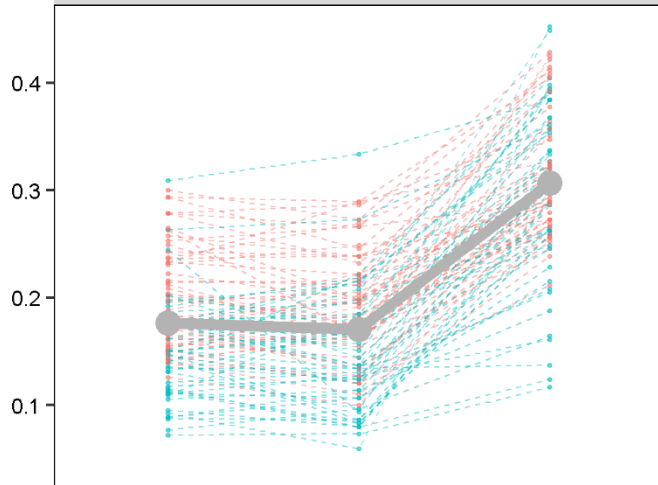

Cluster 2 n= 21 and 16

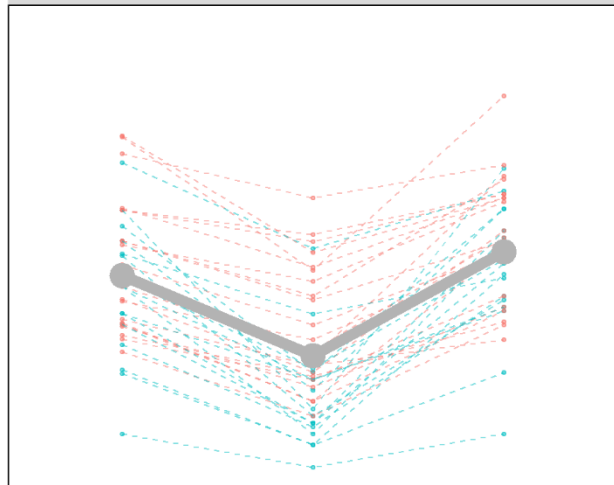

Cluster 3 n= 19 and 25

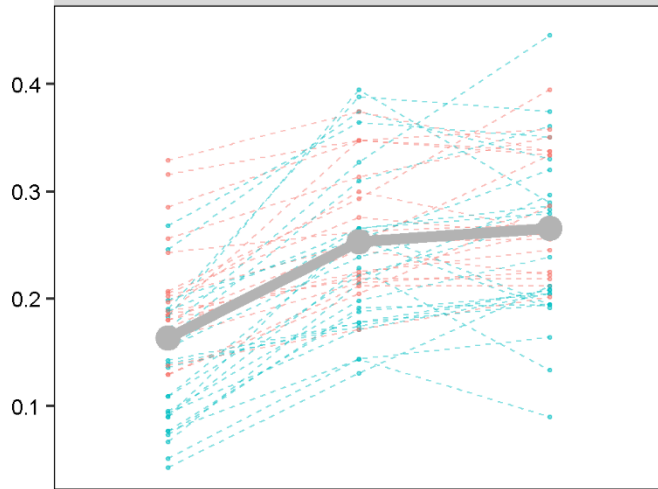

Cluster 4 n= 3 and 4

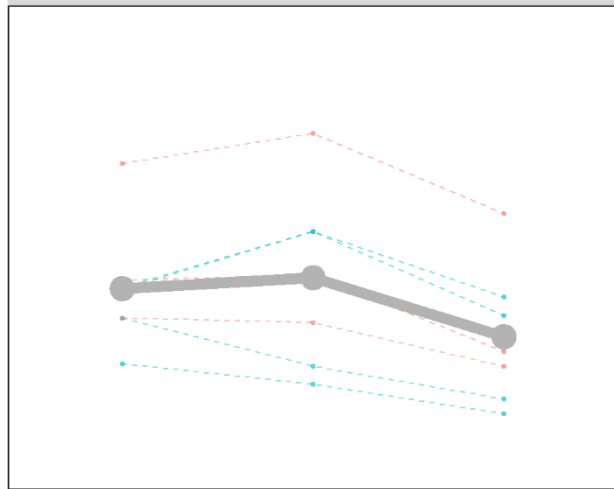

SB14\_Sk

M15\_Sk

M15

SB14\_Sk

M15\_Sk

M15

Acetic acid (g.L<sup>-1</sup>)

Cluster 1 n= 78 and 63

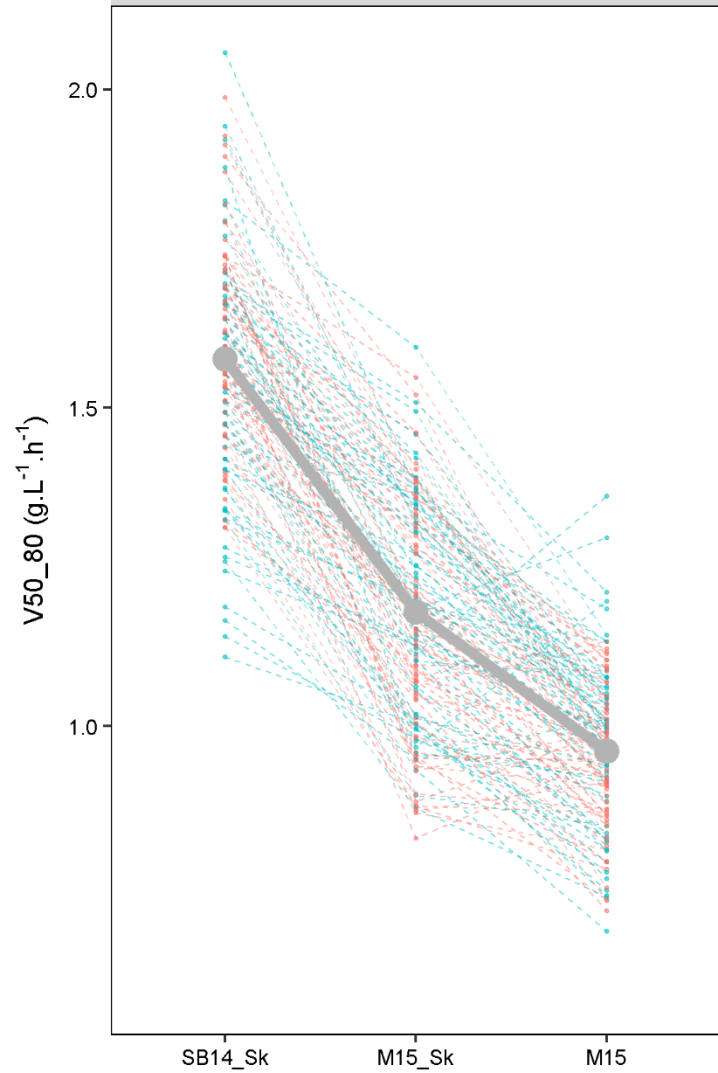

Cluster 2 n= 16 and 31 \*

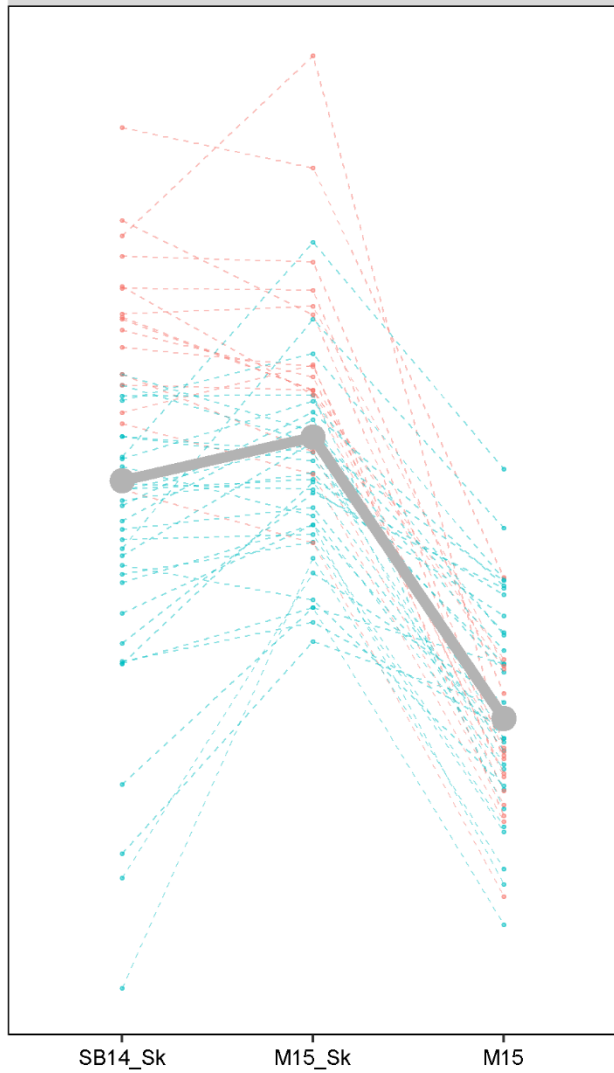



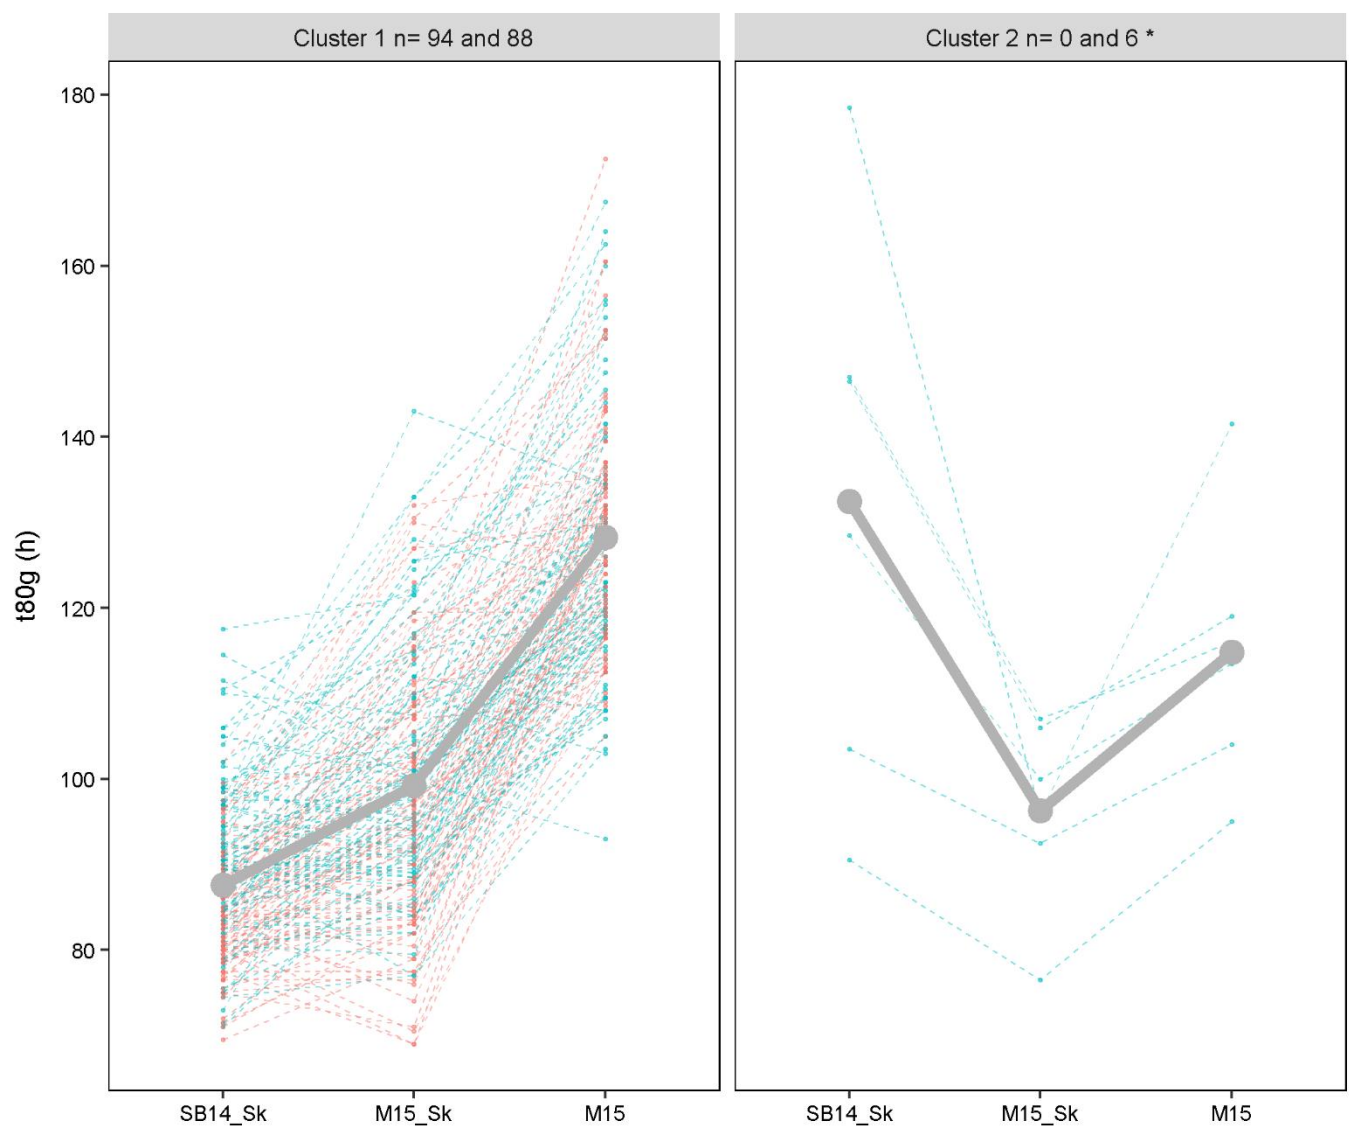

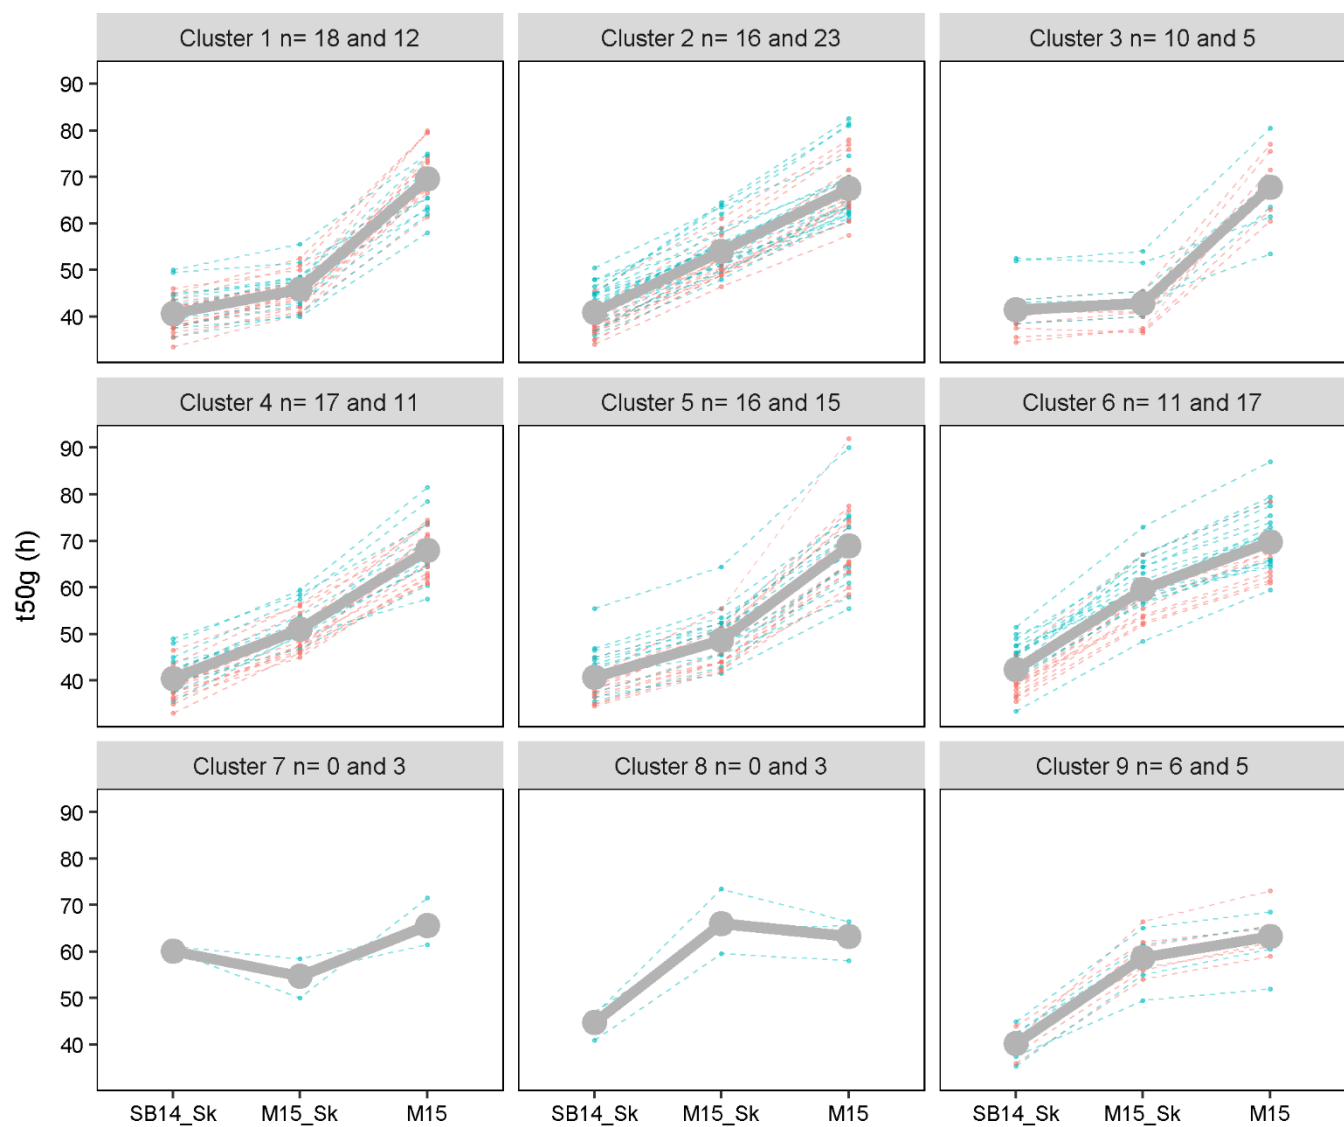

Cluster 1 n= 60 and 40 \*

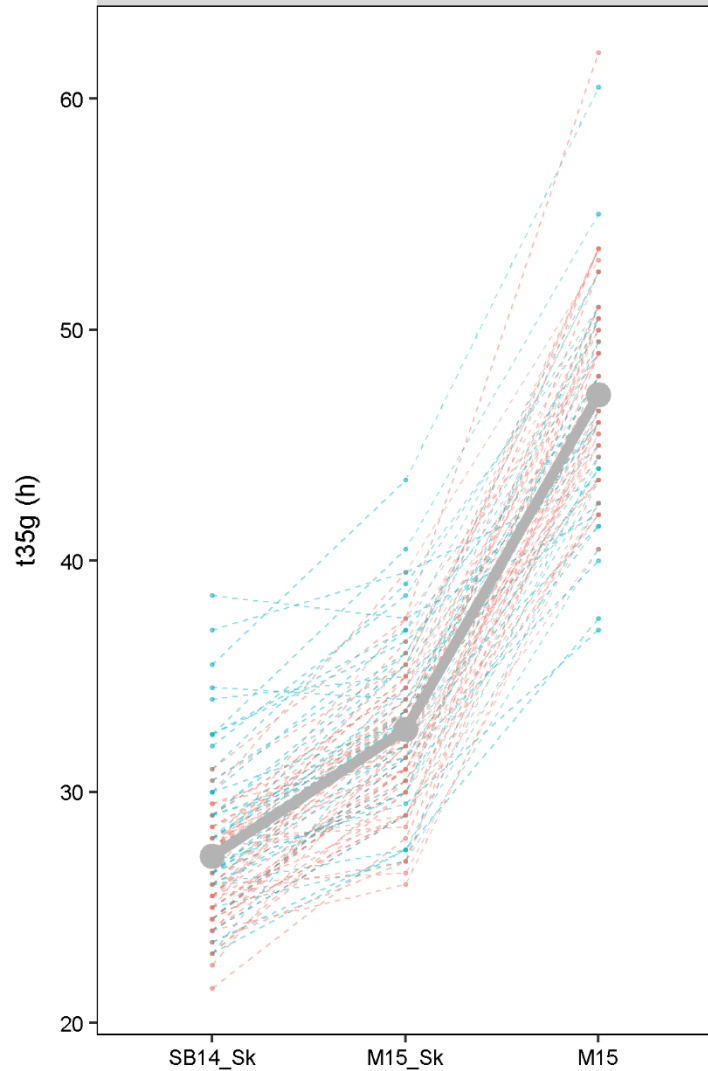

Cluster 2 n= 34 and 54 \*

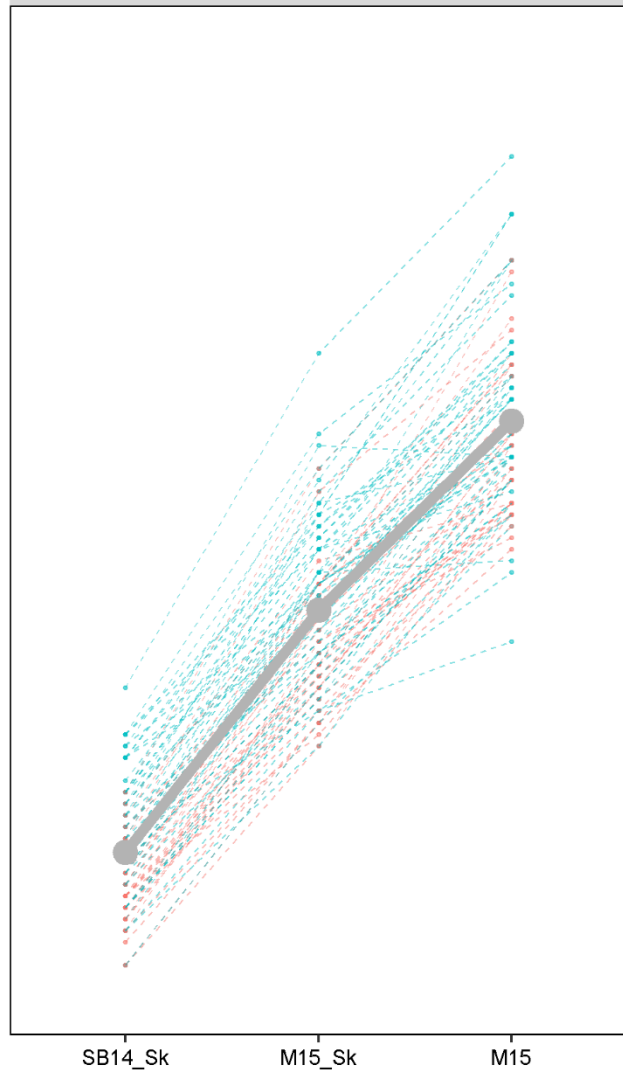







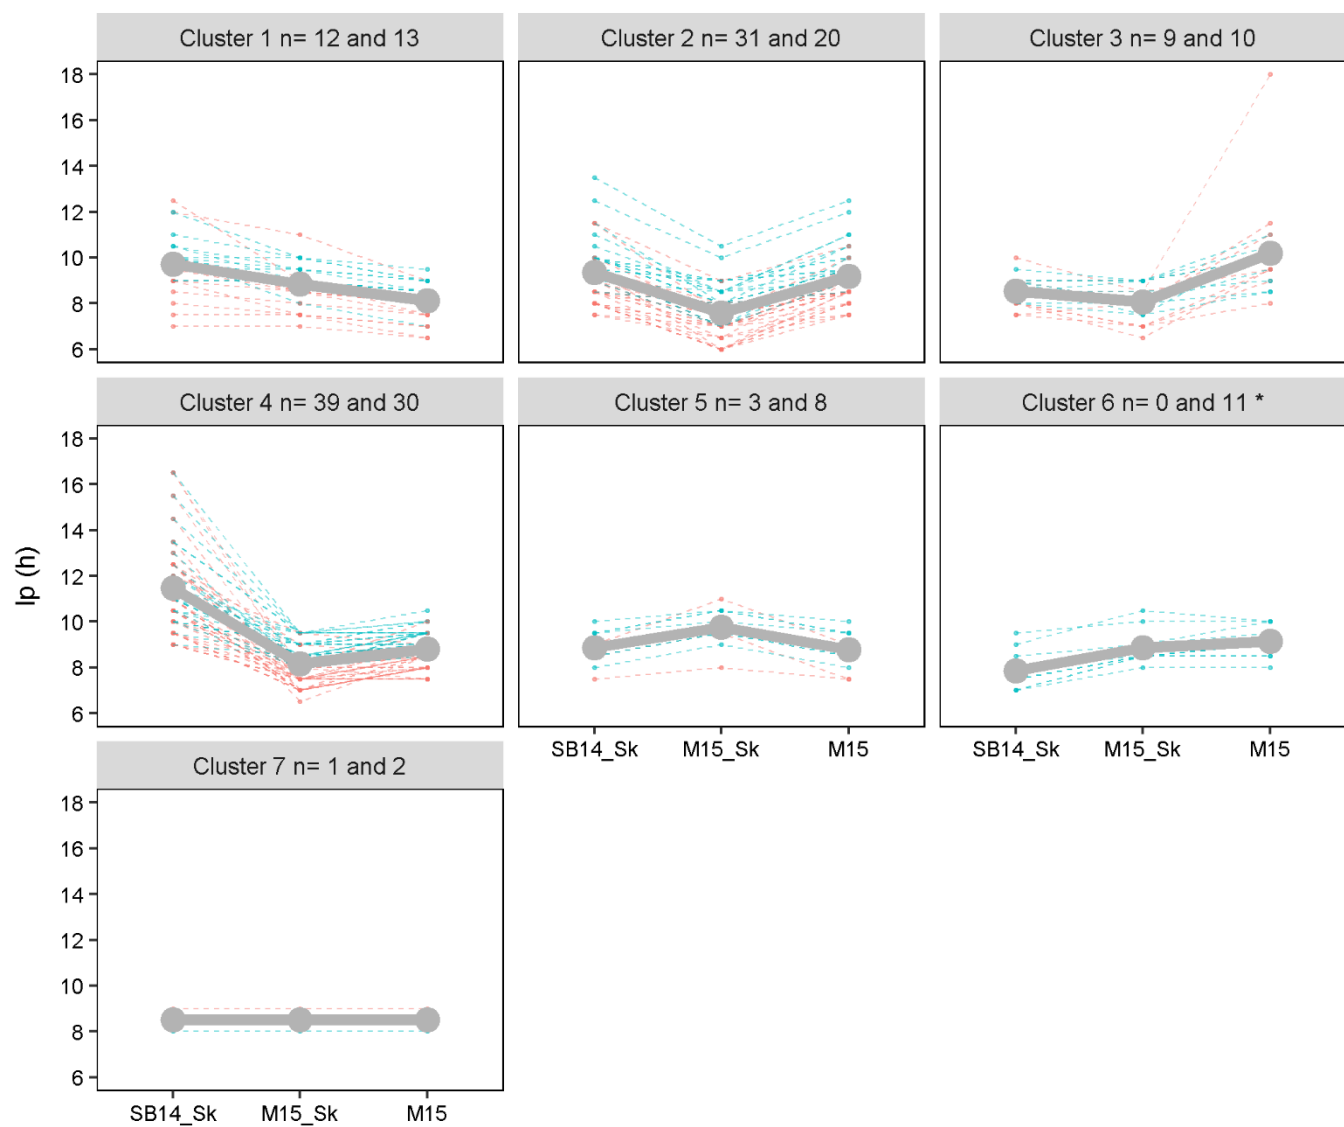

Supplement: 12864_2018_5145_MOESM6_ESM.pdf [file 12864_2018_5145_MOESM6_ESM.pdf]
