# Supplementary material for: Dissection of the molecular bases of genotype x environment interactions: a study of phenotypic plasticity of Saccharomyces cerevisiae in grape juices
Source: PubMed Central journal article supplement (PMC6225642; doi:10.1186/s12864-018-5145-4), 2018-11-09

# XV\_M2xF15\_26284

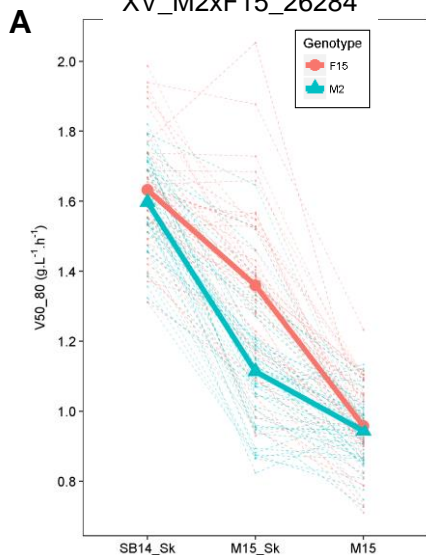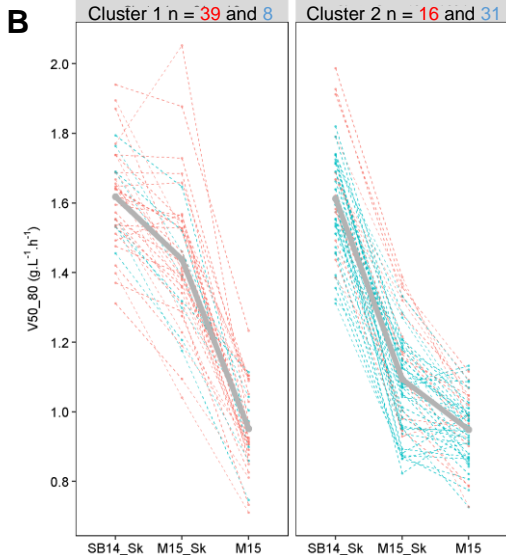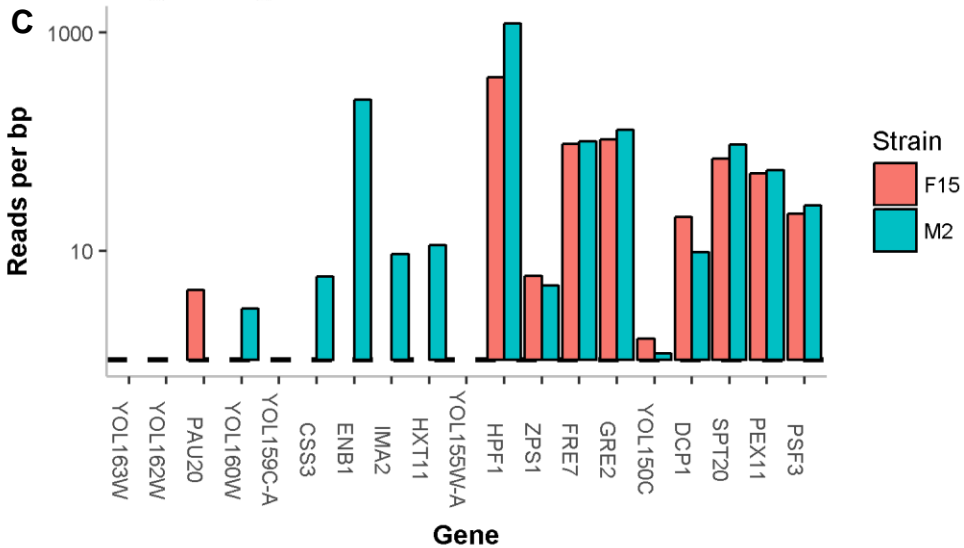

Supplement: 12864_2018_5145_MOESM13_ESM.pdf [file 12864_2018_5145_MOESM13_ESM.pdf]
